# Supplementary material
Source: PubMed Central journal article supplement (PMC2533508)

## Supplemental material

Figure S1. Scatchard plot of equilibrium dialysis data for YdhE binding to rhodamine 6G. The YdhE-rhodamine 6G dialysis experiments were carried out with 2-5  $\mu\text{M}$  monomeric YdhE dialyzed against 3-5  $\mu\text{M}$  rhodamine 6G. The slope of the plot provides a  $K_D$  of  $3.0 \pm 0.1$ , and the interception ( $1.0 \pm 0.2$ ) gives a stoichiometry of 1:1 monomeric YdhE-to-R6G molar ratio.

Fig. S1

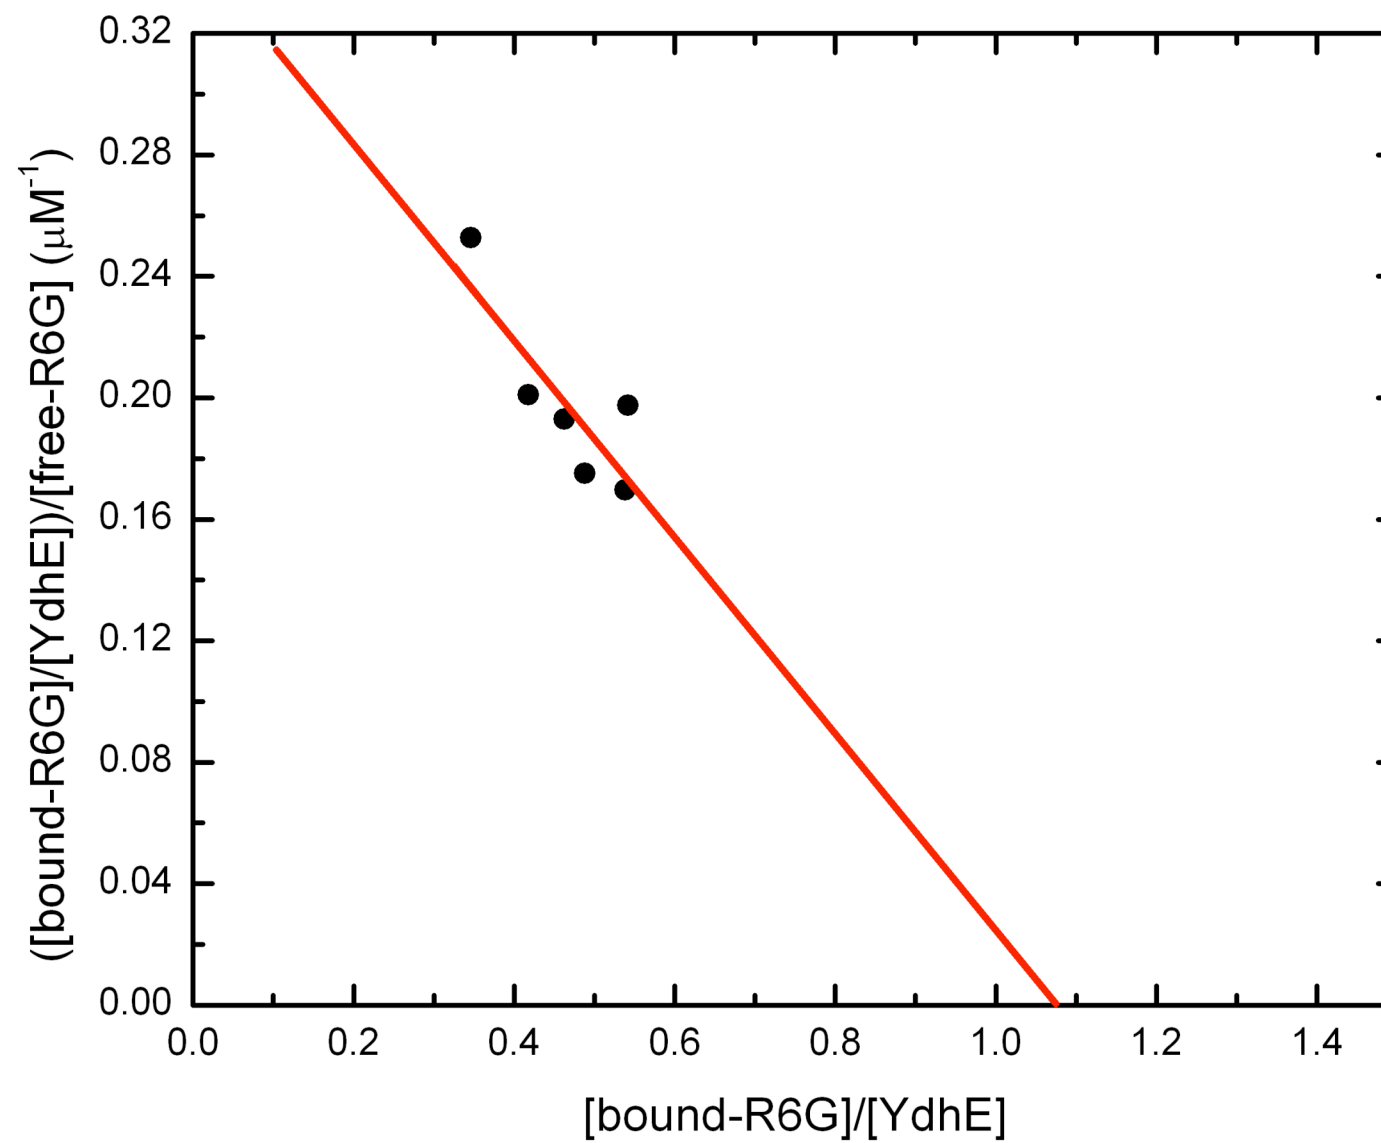

Supplement: AAC.00475-08_1.pdf [file AAC.00475-08_1.pdf]
